# Supplementary material for: Repeated inversions within a pannier intron drive diversification of intraspecific colour patterns of ladybird beetles
Source: PubMed Central journal article supplement (PMC6155092; doi:10.1038/s41467-018-06116-1), 2018-09-21
Supplement: 41467_2018_6116_MOESM3_ESM.pdf [file 41467_2018_6116_MOESM3_ESM.pdf]

## Description of Additional Supplementary Files

File Name: **Supplementary Data 1**

Description: **Markers and Primers for gene association study on the *h* locus**

File Name: **Supplementary Data 2**

Description: **Statistics of the genome assemblies**

File Name: **Supplementary Data 3**

Description: **Raw count data, statistics and annotations of the RNA-seq analyses in the *h* locus candidate region**

File Name: **Supplementary Data 4**

Description: **Motif enrichment in the upper noncoding regions of *pannier* in *H.axyridis* and *C. septempunctata***

File Name: **Supplementary Data 5**

Description: **DNA sequences used in the molecular phylogenetic analyses**  
**a**, The aligned nucleotide sequences of *pannier* ORF before trimming gapped and shifted regions. **b**, The aligned nucleotide sequences of *pannier* ORF after trimming. **c**, The aligned nucleotide sequences of the conserved intronic regions of *pannier* (concatenated three blocks) before trimming gapped and shifted regions. **d**, The aligned nucleotide sequences of the conserved intronic regions of *pannier* after trimming. A dash indicates a gap.

File Name: **Supplementary Data 6**

Description: **Oligo sequences used in the Flexible ddRAD-seq**
